# Supplementary material for: Patterns of evolution at the gametophytic self-incompatibility Sorbus aucuparia (Pyrinae) S pollen genes support the non-self recognition by multiple factors model
Source: PubMed Central journal article supplement — J Exp Bot. 2013 Apr 18;64(8):2423–34. doi: 10.1093/jxb/ert098 (PMC3654429; doi:10.1093/jxb/ert098), 2013-04-18
Supplement: supp_ert098_jexbot093112_file001.pdf [file supp_ert098_jexbot093112_file001.pdf]

**Patterns of evolution at the gametophytic self-incompatibility *Sorbus aucuparia* (Pyrinae) S-pollen genes support the non-self recognition by multiple factors model**

Bruno Aguiar, Jorge Vieira, Ana Estefânia Cunha, Nuno A. Fonseca, David Reboiro-Jato , Miguel Reboiro-Jato, Florentino Fdez-Riverola, Olivier Raspé, and Cristina P. Vieira

**Supp. Table S1.** Primers used in this work

| Forward        |                                  | Reverse            |                         | Annealing temperature (°C) | Size of the expected amplification product (bp) |
|----------------|----------------------------------|--------------------|-------------------------|----------------------------|-------------------------------------------------|
| <i>S-RNase</i> |                                  |                    |                         |                            |                                                 |
| SorbusRNaseF   | AAGTTGTTTACGGTTCAC               | SorbusRNaseR       | TATTCTTTTGGCACTTGA      | 48                         | variable (larger than 409)                      |
| S-RNaseFT-F *  | TTTACGCAGCAATATCAG               | S-RNase(I/T)W- R * | ACRTTYGGCCAAATARTT      | 48                         | variable (larger than 213)                      |
| MaCiF1+        | ATTWTC AATTTACGCAGCAAT<br>AATCAG | Mac2/3R1+          | GBACGTTYGGCCAAATAATTNYC | 50                         | variable (larger than 219)                      |
| S2-RNaseF      | GGACCTCACCCAGAAAAT               | S2-RNaseR          | GTTCAATCTTCGCCTTTG      | 51                         | 450                                             |
| S10-RNaseF     | CTCTAATGGACCTGACCC               | S10-RNaseF         | GCGTATGGCACTTTCAAT      | 51                         | 1050                                            |
| S17-RNaseF     | TTCAGTTCACGGTTTG                 | S17-RNaseF         | CGTTTTGTTTCTGGGTTT      | 50                         | 550                                             |
| S20-RNaseF     | TGGGAAACACAGTGGGAA               | S20-RNaseF         | TTGGCTTTGGATAGGTAA      | 47                         | 200                                             |
| <i>SFBBs</i>   |                                  |                    |                         |                            |                                                 |
| SFBBgenF       | AAGTCYCTGATGMGR TTC              | SFBBgenR           | GTCCATTACCCAYRTYTC      | 48                         | 870 to 889                                      |
| SFBB1F         | ATGAACAACAAACTATCG               | SFBB1R             | TAAATCAAATGAAAGTAA      | 50                         | 642                                             |
| SFBB2F         | CCACTTCTATCCTTCTCC               | SFBB2-1R           | CATTACCCATATTTCAAG      | 49                         | 767                                             |

|                |                     |                |                    |    |      |
|----------------|---------------------|----------------|--------------------|----|------|
|                |                     | SFBB2-2R       | TAATGAGAGCAAAAAGAA | 48 | 705  |
| SFBB3F         | TTCTCAACCGTTCTCAGT  | SFBB3R         | AATCAAATGAAAGTATGC | 52 | 588  |
| SFBB5F         | GTGAAACTCCTGAAGATC  | SFBB5R         | CCTAGTGTCAATGGATAA | 49 | 1015 |
| SFBB6F         | TTCTCATCCTTCACTTGC  | SFBB6R         | AACCTCGTCACATTTCCA | 50 | 879  |
| SFBB7F         | CATCAATAGTCCAAGTTT  | SFBB7-1R       | AAGCAATAYGAAGTGACA | 50 | 789  |
|                |                     | SFBB7-2R       | AACCAGAATAGGGAATGC | 50 | 614  |
| SFBB8F         | CTCTTATCAATAGTCCAT  | SFBB8R         | AAGGTCCAGCAGTTAGGT | 48 | 897  |
| SFBB9F         | TGTATCCTTCTCAACCGT  | SFBB9R         | CTCGCCATCGTTTGCAAG | 52 | 579  |
| SFBB11F        | CTTCTACCTTCCCCwCCT  | SFBB11R        | ATAACAAAATCCCTTCAT | 52 | 279  |
| SFBB13F        | ATTCAGGCAACTTCCCC   | SFBB13R        | TTAGAAAACCTCAAATCC | 52 | 417  |
| SFBB14 F       | CAGGGAAAACCTGTTATTA | SFBB14R        | AAGAAGTGATGGATTCAT | 52 | 489  |
| SFBB15F        | AGACCATCATCCTGTAGT  | SFBB15R        | GACAAGAATCAAGATAGC | 52 | 371  |
| SFBB5Belg6S2F  | GTGAAACTCCTGAAGATC  | SFBB5Belg6S2R  | TAACGAGAGCAATAAGAG | 52 | 893  |
| SFBB5Belg5S20F | TGGACAGCAAACCTCTCAT | SFBB5Belg5S20R | CTCATCACCTAAATCAAT | 55 | 650  |
| SFBB6Belg6S2F  | GAGCGTATTCTTCTTCCC  | SFBB6Belg6S2R  | AACCTCGTCACATTTCCA | 56 | 438  |
| SFBB8Belg6S2F  | GTGGACAACAAACTCTCA  | SFBB8Belg6S2R  | AATAATGTGGAAGGCTCA | 49 | 779  |
| SFBB8Belg5S17F | TGTATCCTTCTCAACTGC  | SFBB8Belg5S17R | TCCGTCATCATAGTCCAT | 48 | 783  |
| SFBB8Belg5S20F | GCAACTTCTGATTCATA   | SFBB8Belg5S20R | TTAGGTGTTTTGTCCATA | 48 | 560  |

\* according to Kim *et al.* 2009

+ according to Carrera *et al.* 2009

**Supp. Table S2.** RFLP's used to identify *SFBB1*, *SFBB2*, *SFBB3*, *SFBB5*, *SFBB7*, *SFBB8*, *SFBB9*, *SFBB11*, *SFBB13*, and *SFBB14* genes of the *S22* and *Sa*-haplotypes

| Gene         | Primers         | Enzyme     | Haplotype                  |                     |                                |                   |
|--------------|-----------------|------------|----------------------------|---------------------|--------------------------------|-------------------|
|              |                 |            | <i>S22</i>                 | <i>Sa</i>           | <i>Sc</i>                      |                   |
| <i>SFBB1</i> | SFBB1F+SFBB1R   | <i>S22</i> | <i>Sau</i> 3AI             | 115;168; <u>359</u> | 115;126;168;233                | n.a.              |
|              |                 | <i>Sa</i>  | <i>Hind</i> III            | 642                 | 86; <u>556</u>                 | n.a               |
| <i>SFBB2</i> | SFBB2F+SFBB2-1R | <i>S22</i> | <i>Aci</i> I               | 115; <u>652</u>     | 767                            | 767               |
|              |                 | <i>Sa</i>  | <i>Bcc</i> I               | 767                 | 68; <u>263</u> ; <u>436</u>    | 732               |
| <i>SFBB3</i> | SFBB3F+SFBB3R   | <i>S22</i> | <i>Taq</i> I               | <u>78</u> ;217;293  | 293;295                        | 293;295           |
|              |                 | <i>Sa</i>  | <i>Rsa</i> I               | 63;114;160;251      | 28;63; <u>223</u> ; <u>274</u> | 63;114;160;251    |
| <i>SFBB5</i> | SFBB5F+SFBB5R   | <i>S22</i> | <i>Ple</i> I               | 145;870             | 1015                           | 915               |
|              |                 | <i>Sa</i>  | <i>Hpy</i> CH4IV           | 226;789             | 226; <u>297</u> ; <u>492</u>   | 226;789           |
| <i>SFBB7</i> | SFBB7F+SFBB7R   | <i>S22</i> | <i>Ple</i> I               | 202; <u>567</u>     | 789                            | 202;615 (n.a)     |
|              |                 | <i>Sa</i>  | <i>Bsr</i> I               | 789                 | <u>316</u> ; <u>473</u>        | 789               |
| <i>SFBB8</i> | SFBB8F+SFBB8R   | <i>S22</i> | <i>Ava</i> II              | 6; <u>194</u> ;697  | 6;52;142;697                   | 6;52;142;697      |
|              |                 | <i>Sa</i>  | <i>Alu</i> I+ <i>Mbo</i> I | 30;334;515          | 30;204; <u>311</u> ;334        | 30;54;204;255;334 |
| <i>SFBB9</i> | SFBB9F+SFBB9R   | <i>S22</i> | <i>Mse</i> I               | 122; <u>457</u>     | 88;122;369                     | 88;122;369        |

|               |                 |            |                    |                       |                         |            |
|---------------|-----------------|------------|--------------------|-----------------------|-------------------------|------------|
|               |                 | <i>Sa</i>  | <i>AluI+Sau3AI</i> | 89;132;358            | <u>257</u> ;322         | 36;221;322 |
| <i>SFBB11</i> | SFBB11F+SFBB11R | <i>S22</i> | <i>DdeI</i>        | 17;63; <u>93</u> ;106 | 17;106;156              | n.a        |
|               |                 | <i>Sa</i>  | <i>HpyCH4IV</i>    | 279                   | <u>139</u> ; <u>140</u> | 279        |
| <i>SFBB13</i> | SFBB13F+SFBB13R | <i>S22</i> | <i>RsaI</i>        | 49; <u>81</u> ;287    | 130;287                 | 130;287    |
|               |                 | <i>Sa</i>  | <i>NlaIII</i>      | 200; <u>217</u>       | 24;193;200              | 24;193;200 |
| <i>SFBB14</i> | SFBB14F+SFBB14R | <i>S22</i> | <i>MwoI</i>        | 225; <u>264</u>       | 489                     | n.a.       |
|               |                 | <i>Sa</i>  | <i>HindIII</i>     | 489                   | <u>110</u> ; <u>379</u> | 489        |

---

**Supp. Table S3.** Patterns used on the identification of alleles from *SFBB1*, *SFBB2*, *SFBB3*, *SFBB5*, *SFBB6*, *SFBB7*, *SFBB8*, *SFBB9*, *SFBB11*, *SFBB13*, and *SFBB14* genes in the segregation experiment.

| Gene         | Characterized alleles with specific primers               | Primers                       | Restriction enzymes | Belgium5S17      | Belgium5S20        | Belgium6S2            | Belgium6S10        |
|--------------|-----------------------------------------------------------|-------------------------------|---------------------|------------------|--------------------|-----------------------|--------------------|
| <i>SFBB1</i> | <i>S2-SFBB1</i> *<br><i>S17-SFBB1</i><br><i>S20-SFBB1</i> | SFBB1F + SFBB1R               | <i>Nla</i> III      | 52;58;75;129;328 | 52;58;75;129;328   | 52;58;129; <u>403</u> | n.a.               |
| <i>SFBB2</i> | <i>S10-SFBB2</i> *<br><i>S20-SFBB2</i> *                  | SFBB2F + SFBB2-2R             | <i>Dde</i> I        | n.a              | 42;300; <u>363</u> | n.a                   | <u>159;246;300</u> |
| <i>SFBB3</i> | <i>S2-SFBB3</i>                                           | SFBB3F + SFBB3R               | <i>Bse</i> XI       | <u>145;443</u>   | 588                | 588                   | 588                |
|              | <i>S10-SFBB3</i>                                          |                               | <i>Mae</i> III      | 588              | <u>247;341</u>     | 588                   | 588                |
|              | <i>S17-SFBB3</i> *                                        |                               |                     |                  |                    |                       |                    |
| <i>SFBB5</i> | <i>S20-SFBB3</i> *                                        |                               |                     |                  |                    |                       |                    |
|              | <i>S2-SFBB5</i> *<br><i>S10-SFBB5</i><br><i>S17-SFBB5</i> | SFBB5Belg6S2F+SFBB5Belg6S2F   |                     | n.a              | n.a                | 893                   | n.a                |
|              | <i>S20-SFBB5</i> *                                        | SFBB5Belg5S20F+SFBB5Belg5S20R |                     | n.a              | 650                | n.a                   | n.a                |
| <i>SFBB6</i> | <i>S2-SFBB6</i> *<br><i>S10-SFBB6</i>                     | SFBB6Belg6S2F+ SFBB6Belg6S2R  |                     | n.a              | n.a                | 438                   | n.a                |
|              | <i>S17-SFBB6</i> *                                        | SFBB6F + SFBBgenR             | <i>Ava</i> I        | 780              | <u>304;476</u>     | 780                   | 780                |

|               |                    |                               |               |                      |                       |                    |                       |
|---------------|--------------------|-------------------------------|---------------|----------------------|-----------------------|--------------------|-----------------------|
|               | <i>S20-SFBB6</i>   |                               |               |                      |                       |                    |                       |
| <i>SFBB7</i>  | <i>S2-SFBB7</i> ,  | SFBB7F + SFBB7-1R             | <i>DdeI</i>   | <u>264;525</u>       | <u>35;264;490</u>     | n.a                | n.a.                  |
|               | <i>S10-SFBB7*</i>  | SFBB7F + SFBB7-2R             | <i>Sau3AI</i> | 52;227;335           | 52;227;335            | n.a                | <u>52;161;174;227</u> |
|               | <i>S17-SFBB7*</i>  |                               |               |                      |                       |                    |                       |
|               | <i>S20-SFBB7*</i>  |                               |               |                      |                       |                    |                       |
| <i>SFBB8</i>  | <i>S2-SFBB8*</i>   | SFBB8Belg6S2F+SFBB8Belg6S2R   |               | n.a                  | n.a                   | 779                | n.a                   |
|               | <i>S10-SFBB8</i>   |                               |               | -                    | -                     | -                  | -                     |
|               | <i>S17-SFBB8*</i>  | SFBB8Belg5S17F+SFBB8Belg5S17R |               | 783                  | n.a                   | n.a                | n.a                   |
|               | <i>S20-SFBB8*</i>  | SFBB8Belg5S20F+SFBB8Belg5S20R |               | n-a                  | 560                   | n.a                | n.a                   |
| <i>SFBB9</i>  | <i>S2-SFBB9*</i>   | SFBB9F + SFBB9R               | <i>Sau3AI</i> | <u>257;322</u>       | <u>579</u>            | 89; <u>168;322</u> | 89; <u>490</u>        |
|               | <i>S10-SFBB9*</i>  |                               |               |                      |                       |                    |                       |
|               | <i>S17-SFBB9*</i>  |                               |               |                      |                       |                    |                       |
|               | <i>S20-SFBB9*</i>  |                               |               |                      |                       |                    |                       |
| <i>SFBB11</i> | <i>S10-SFBB11*</i> | SFBB11F + SFBB11R             | <i>AciI</i>   | <u>93;186</u>        | 279                   | n.a                | 279                   |
|               | <i>S17-SFBB11*</i> |                               | <i>RsaI</i>   | 47;232               | 47; <u>88;144</u>     | n.a                | 47;232                |
|               | <i>S20-SFBB11*</i> |                               |               |                      |                       |                    |                       |
| <i>SFBB13</i> | <i>S2-SFBB13*</i>  | SFBB13F + SFBB13R             | <i>NcoI</i>   | <u>417</u>           | n.a                   | <u>204;213</u>     | n.a                   |
|               | <i>S10-SFBB13*</i> |                               | <i>PvuI</i>   | <u>200;217</u>       | n.a                   | <u>417</u>         | n.a                   |
| <i>SFBB14</i> | <i>S2-SFBB14*</i>  | SFBB14F + SFBB14R             | <i>ApoI</i>   | 42;51;57; <u>339</u> | 42;93;152; <u>244</u> | 42;51;396          | 42;51;396             |
|               | <i>S10-SFBB14*</i> |                               | <i>MfeI</i>   | 72;99;318            | 72; <u>417</u>        | 72;99;318          | 99; <u>388</u>        |

*S17-SFBB14\**

*NlaIII*

489

67;422

67;422

67;422

*S20-SFBB14\**

---

\* alleles that could be followed in the segregation experiment





**Supp. Table S4.** Polymorphism at the amino acid sites under positive selection between *S22* and *Sa*-haplotypes

| Gene          |            | 25 | 42 | 47 | 52 | 89 | 91 | 147 | 149 | 179 | 197 | 212 | 220 | 236 | 266 |
|---------------|------------|----|----|----|----|----|----|-----|-----|-----|-----|-----|-----|-----|-----|
| <i>SFBB1</i>  | <i>S22</i> | M  | N  | D  | P  | F  | E  | I   | T   | E   | T   | E   | C   | T   | Q   |
|               | <i>Sa</i>  | .  | .  | .  | .  | .  | .  | .   | .   | .   | .   | .   | .   | .   | .   |
| <i>SFBB2</i>  | <i>S22</i> | V  | M  | D  | R  | H  | S  | T   | Q   | M   | T   | D   | N   | S   | L   |
|               | <i>Sa</i>  | .  | .  | .  | .  | .  | .  | .   | .   | .   | .   | .   | .   | .   | .   |
| <i>SFBB3</i>  | <i>S22</i> | L  | F  | D  | R  | P  | Q  | T   | H   | E   | T   | S   | P   | T   | N   |
|               | <i>Sa</i>  | .  | .  | .  | .  | .  | E  | .   | .   | .   | .   | T   | .   | .   | E   |
| <i>SFBB5</i>  | <i>S22</i> | I  | V  | D  | Q  | N  | E  | I   | K   | E   | M   | D   | P   | C   | K   |
|               | <i>Sa</i>  | .  | .  | .  | .  | .  | .  | .   | .   | .   | .   | .   | .   | .   | .   |
| <i>SFBB6</i>  | <i>S22</i> | V  | V  | D  | R  | N  | K  | L   | K   | K   | T   | D   | P   | N   | N   |
|               | <i>Sa</i>  | .  | .  | .  | .  | .  | .  | .   | .   | .   | .   | .   | .   | .   | .   |
| <i>SFBB7</i>  | <i>S22</i> | M  | V  | D  | Q  | N  | E  | T   | K   | R   | P   | E   | P   | Y   | E   |
|               | <i>Sa</i>  | .  | .  | .  | .  | .  | D  | .   | .   | G   | T   | .   | .   | .   | K   |
| <i>SFBB8</i>  | <i>S22</i> | V  | A  | E  | Q  | E  | E  | T   | K   | G   | M   | K   | P   | C   | K   |
|               | <i>Sa</i>  | .  | .  | .  | .  | .  | .  | .   | .   | .   | .   | .   | .   | .   | .   |
| <i>SFBB9</i>  | <i>S22</i> | V  | M  | D  | Y  | P  | Q  | T   | E   | E   | T   | K   | Q   | N   | K   |
|               | <i>Sa</i>  | .  | .  | .  | .  | .  | .  | .   | .   | .   | .   | .   | .   | .   | .   |
| <i>SFBB11</i> | <i>S22</i> | V  | A  | D  | Q  | F  | L  | S   | Q   | E   | A   | T   | S   | T   | R   |
|               | <i>Sa</i>  | .  | .  | .  | .  | .  | .  | N   | .   | .   | T   | .   | .   | .   | .   |
| <i>SFBB13</i> | <i>S22</i> | M  | A  | D  | P  | F  | Q  | I   | G   | Q   | M   | E   | H   | I   | E   |
|               | <i>Sa</i>  | .  | .  | .  | .  | .  | .  | .   | .   | .   | .   | .   | .   | .   | .   |
| <i>SFBB14</i> | <i>S22</i> | I  | M  | D  | Y  | P  | Q  | I   | G   | E   | I   | K   | P   | S   | K   |
|               | <i>Sa</i>  | .  | .  | .  | .  | .  | .  | S   | .   | .   | .   | E   | .   | .   | .   |
